# Supplementary material for: Efficient and Stable Planar n–i–p Sb2Se3 Solar Cells Enabled by Oriented 1D Trigonal Selenium Structures
Source: PubMed Central journal article supplement (PMC7435233; doi:10.1002/advs.202001013), 2020-06-30
Supplement: ADVS-7-2001013-s001.pdf [file ADVS-7-2001013-s001.pdf]

## Supporting Information

**Efficient and Stable Planar n-i-p  $\text{Sb}_2\text{Se}_3$  Solar Cells Enabled by Oriented One-dimensional Trigonal Selenium Structures**

*Kai Shen\**, Yu Zhang, Xiaoqing Wang, Chizhu Ou, Fei Guo, Hongbing Zhu, Cong Liu, Yanyan Gao, Ruud E. I. Schropp, Zhiqiang Li, Xianhu Liu, Yaohua Mai\*

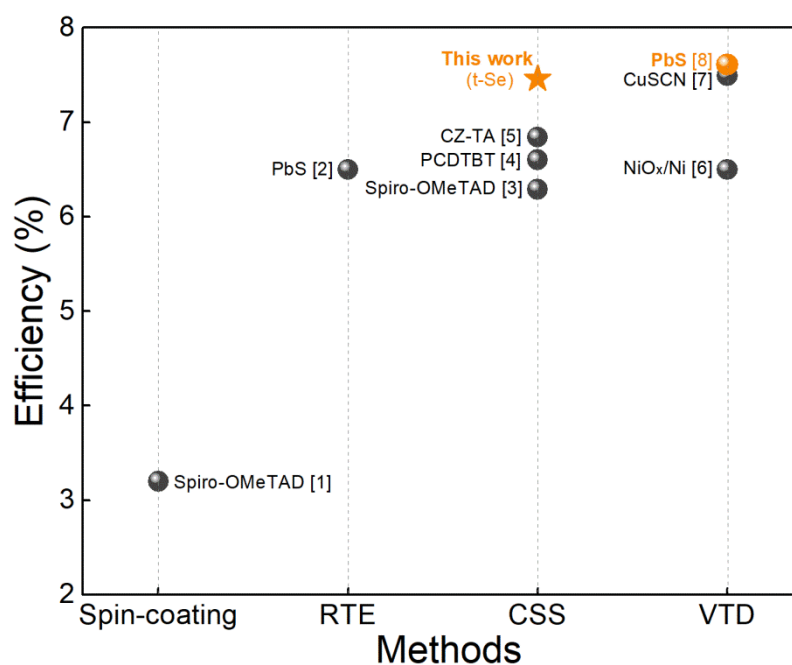

**Figure S1** The efficiency versus  $\text{Sb}_2\text{Se}_3$  deposition method for the preparation of superstrate  $\text{Sb}_2\text{Se}_3$  solar cells with different contact/hole transport materials.<sup>1-8</sup> The efficiency (7.45%) obtained in this

work is the highest efficiency among all the reported superstrate  $\text{Sb}_2\text{Se}_3$  solar cells fabricated by CSS, and very close to the record efficiency (7.62%) of the superstrate  $\text{Sb}_2\text{Se}_3$  solar cell. It's noted that, the VTD-devices with higher efficiencies 7.62% and 7.50% used PbS and CuSCN as hole transport layer, respectively. The toxicity of Pb and high-mobility Cu impurity limit the safety and long-term stability of the devices.

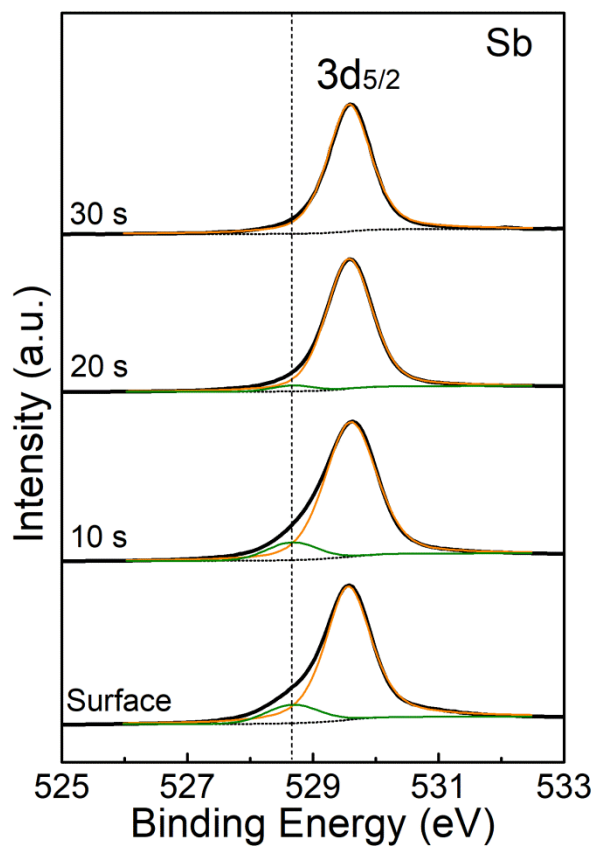

**Figure S2** The Sb 3d peaks of Sb<sub>2</sub>Se<sub>3</sub> surface versus the etching time. The etching rate is about 8 nm/min. The intensities of shoulder peaks at 528.7 eV decreased and disappeared with the increase of depth, which indicates that the detectable Se deficiency only exists within several nanometers of the surface.

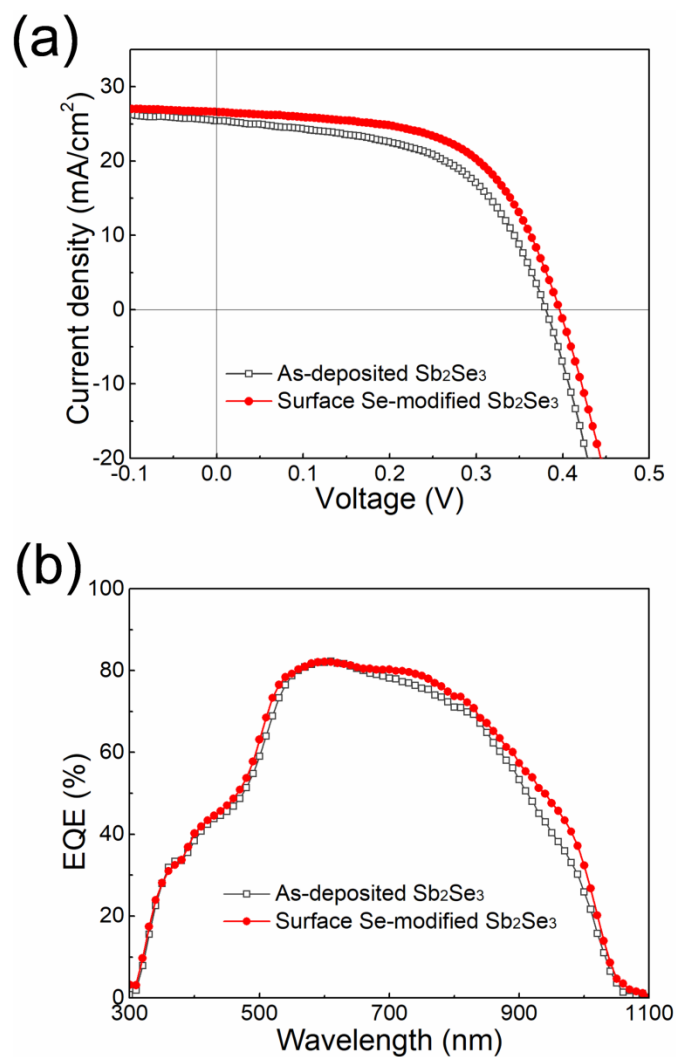

**Figure S3** a) The J-V curves and b) EQE curves of Sb<sub>2</sub>Se<sub>3</sub> solar cells with as-deposited Sb<sub>2</sub>Se<sub>3</sub> and with surface Se-modified Sb<sub>2</sub>Se<sub>3</sub>. The device with Se-modified Sb<sub>2</sub>Se<sub>3</sub> showed improved device performance and enhanced spectral response at the long wavelength.

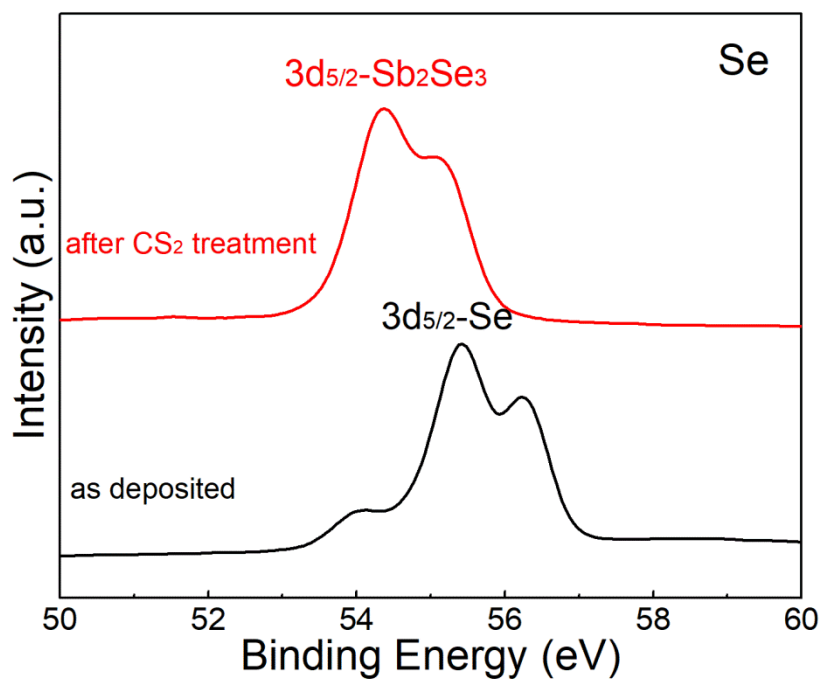

**Figure S4** The Se 3d<sub>5/2</sub> peaks of the surface of Sb<sub>2</sub>Se<sub>3</sub>/t-Se(2 nm) sample before and after CS<sub>2</sub> treatment. After re-evaporated at 150 °C and immersed in CS<sub>2</sub> solution, the surface of the sample was pure Sb<sub>2</sub>Se<sub>3</sub> surface without Se residue.

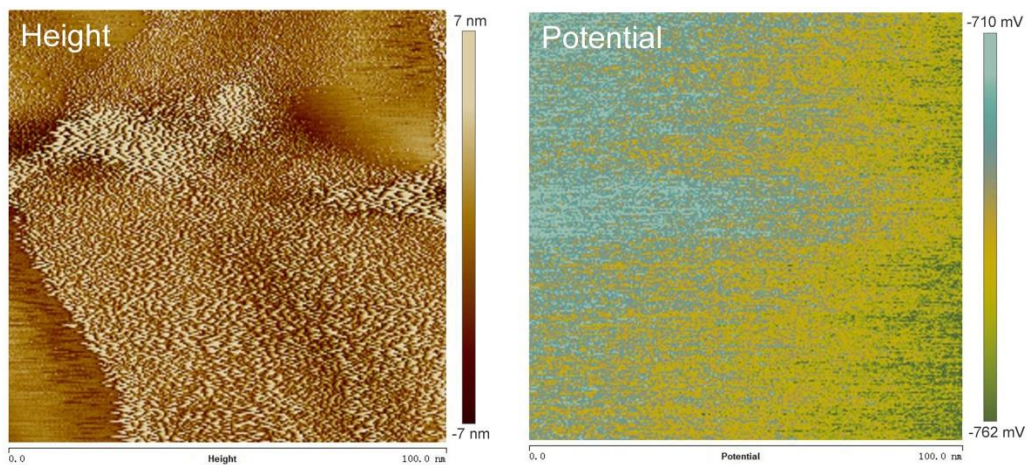

**Figure S5** The AFM and KPFM images of Au film ( $\sim 100$  nm). The Au sample was measured together with the  $\text{Sb}_2\text{Se}_3$  samples in Figure 2 to calibrate the potential value of the probe. The KPFM results indicate a work-function difference of  $\sim 500$  mV between the Se modified  $\text{Sb}_2\text{Se}_3$  surface and Au surface, which is consistent with the work-function value of  $\text{Sb}_2\text{Se}_3$  calculated by UPS.

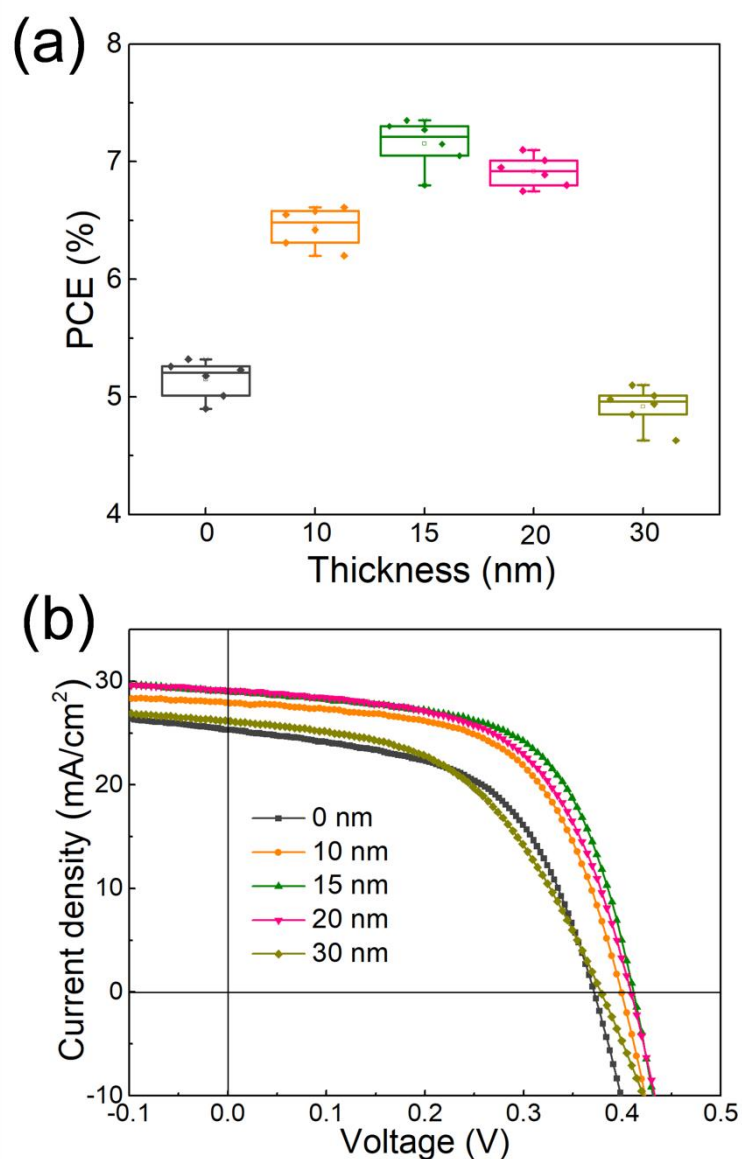

**Figure S6** (a) The statistic PCEs and (b) the representative J-V curves of Sb<sub>2</sub>Se<sub>3</sub> solar cells with different t-Se layer thickness. Most of the devices with t-Se layer presented performance improvements. Solar cells with 15 nm t-Se layer showed the highest power conversion efficiency.

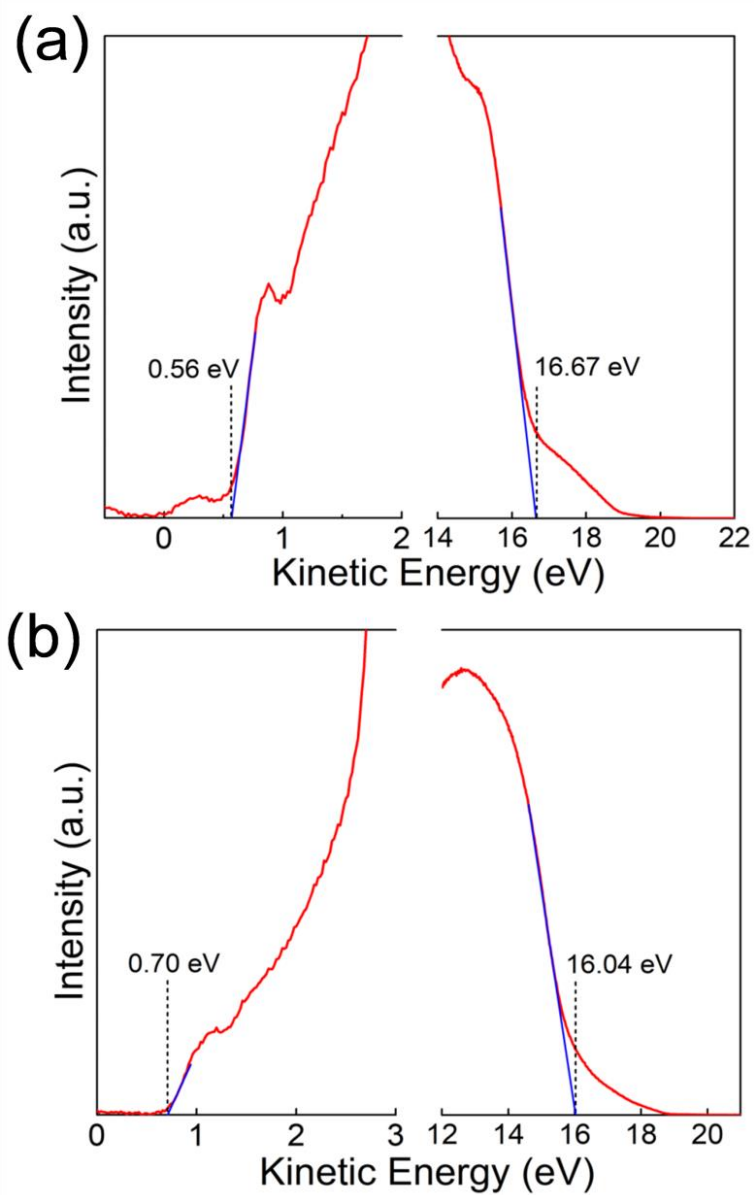

**Figure S7** The UPS cutoff spectra of a)  $\text{Sb}_2\text{Se}_3$  film and b) t-Se film. The measurement use the HeI (21.22 eV) emission line. The calculated VBM and work functions are 0.56 eV and 4.55 eV for  $\text{Sb}_2\text{Se}_3$  film, and 0.70 eV and 5.18 eV for t-Se film, respectively.



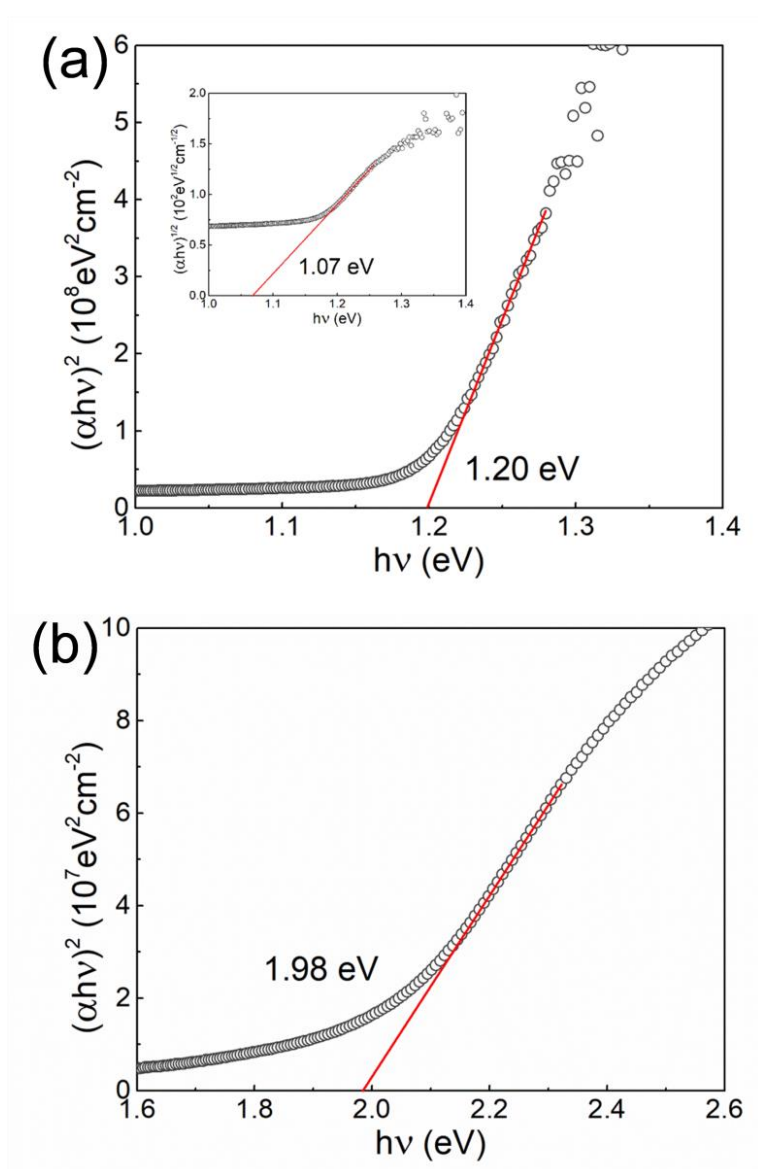

**Figure S8** (a) Tauc plot ( $n = 2$ , direct,  $E_g = 1.20 \text{ eV}$ ; and insert,  $n = 1/2$ , indirect,  $E_g = 1.07 \text{ eV}$ ) for  $\text{Sb}_2\text{Se}_3$  film. (b) Tauc plot for t-Se film,  $E_g = 1.98 \text{ eV}$ .

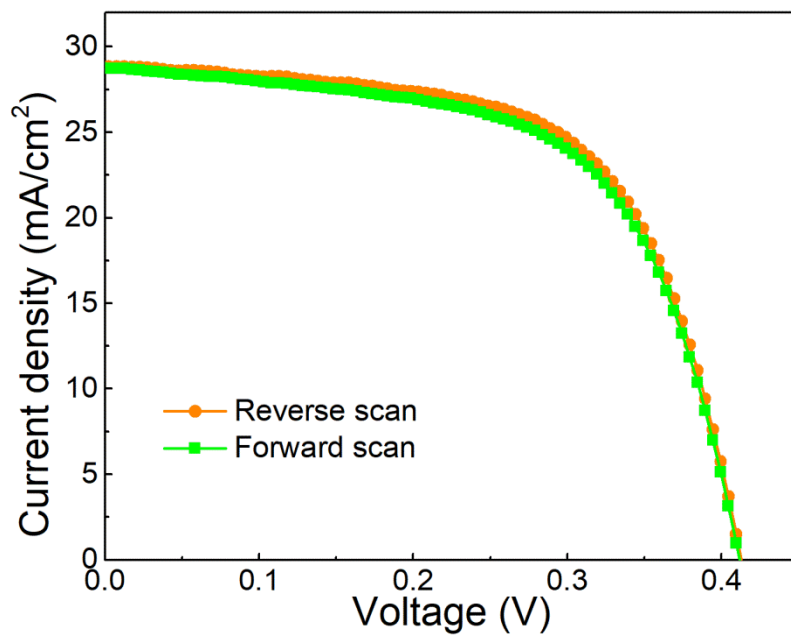

**Figure S9** The  $J$ - $V$  curves of the  $\text{Sb}_2\text{Se}_3$  solar cell with t-Se layer measured in both forward and reverse scan directions. No hysteresis between forward and reverse scans was observed.

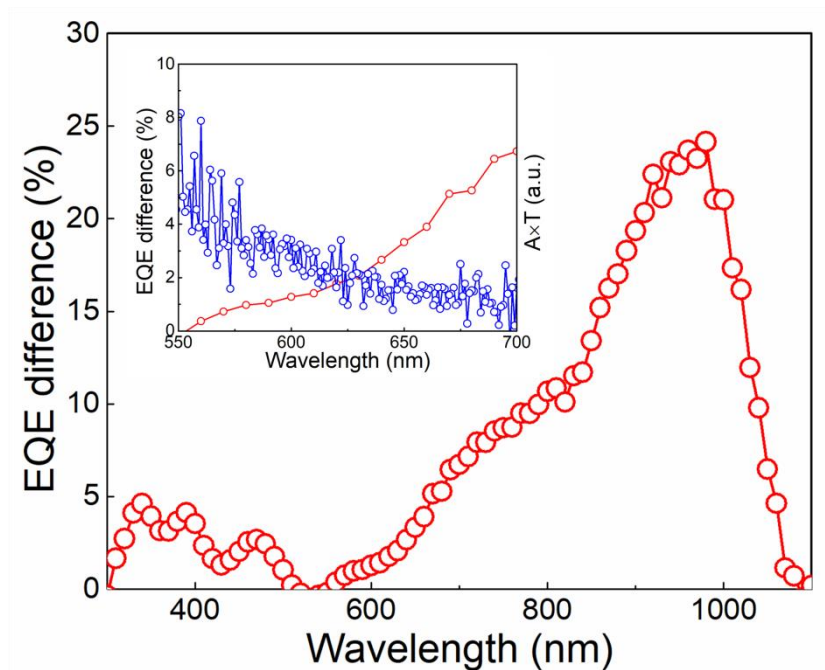

**Figure S10** The difference between the EQE values of the  $\text{Sb}_2\text{Se}_3$  solar cells with and without the t-Se layer. A is the absorption of t-Se and T is the transmittance of  $\text{Sb}_2\text{Se}_3$  film. At the wavelength of  $\sim 625$  nm (corresponding to the bandgap of t-Se: 1.98 eV), the total EQE enhancement is relatively small ( $<3\%$ ). Further, there are no obvious peaks both for EQE difference and light absorption by t-Se at 625 nm (see the inset), which indicates that the t-Se layer doesn't absorb the photons passing through the  $\text{Sb}_2\text{Se}_3$  absorber and contribute to the EQE enhancement.

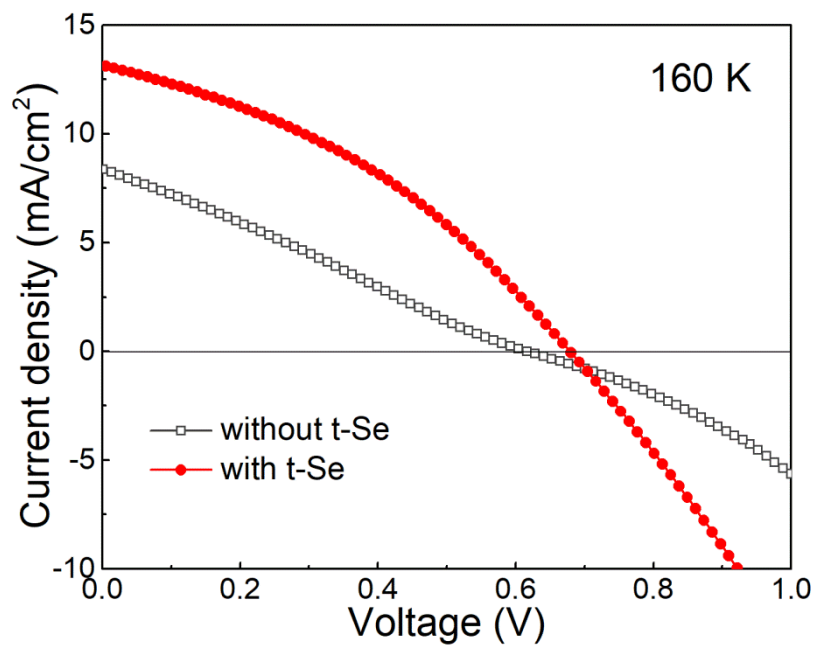

**Figure S11** The J-V curves of Sb<sub>2</sub>Se<sub>3</sub> solar cells with and without t-Se at 160 K. The device without t-Se appeared distinct rollover at high bias, while the device with t-Se behaved normal J-V curve. It suggested that t-Se structure reduced the Schottky barrier at the back contact.

## References:

- [1] X. Wang, R. Tang, Y. Yin, H. Ju, C. Zhu and T. Chen, *Solar Energy Materials and Solar Cells*, **2019**, 189, 5.
- [2] C. Chen, L. Wang, L. Gao, D. Nam, D. Li, K. Li, Y. Zhao, C. Ge, H. Cheong, H. Liu, H. Song and J. Tang, *ACS Energy Letters*, **2017**, 2, 2125.
- [3] C. Ou, K. Shen, Z. Li, H. Zhu, T. Huang and Y. Mai, *Solar Energy Materials and Solar Cells*, **2019**, 194, 47.
- [4] O. S. Hutter, L. J. Phillips, K. Durose and J. D. Major, *Solar Energy Materials and Solar Cells*, **2018**, 188, 177.
- [5] D.-B. Li, X. Yin, C. R. Grice, L. Guan, Z. Song, C. Wang, C. Chen, K. Li, A. J. Cimaroli, R. A. Awni, D. Zhao, H. Song, W. Tang, Y. Yan and J. Tang, *Nano Energy*, **2018**, 49, 346.
- [6] J. Zhang, R. Kondrotas, S. Lu, C. Wang, C. Chen and J. Tang, *Solar Energy*, **2019**, 182, 96.
- [7] K. Li, S. Wang, C. Chen, R. Kondrotas, M. Hu, S. Lu, C. Wang, W. Chen and J. Tang, *Journal of Materials Chemistry A*, **2019**, 7, 9665.
- [8] K. Li, C. Chen, S. Lu, C. Wang, S. Wang, Y. Lu and J. Tang, *Advanced Materials*, **2019**, 31, 1903914.
